# Supplementary material
Source: bioRxiv or medRxiv preprint supplement (https://medrxiv.org/content/medrxiv/early/2021/02/04/2021.02.01.21250946/DC1/embed/media-1.pdf)
Supplement: Supplementary file [file media-1.pdf]

# HOW TO COLLECT SALIVA FOR COVID-19 TESTING

## Collection instructions for Pipette Tip (“P1000”)

### Before you begin

*This test is designed to test saliva that naturally pools in your mouth (for example when you think about a delicious meal).*

**It is very important that you do not try to force yourself to produce a saliva sample. Please do not cough anything up from your chest and please don’t sniff anything back from your nose and into your mouth.**

For at least 30 minutes before saliva collection, it is important that you **DO NOT**:

1. Eat or drink
2. Smoke
3. Clean your teeth
4. Chew gum
5. Use nasal sprays

Doing any of these activities could cause you to get an incorrect result.

### Collection kit materials

In addition to these instructions, you should receive:

- One (1) labeled screw-cap tube
- One (1) pipette tip
- One (1) single-use alcohol wipe
- One (1) collection usability survey

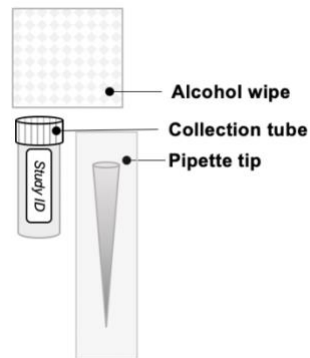

### How to collect saliva

*Before providing your sample, first carefully read through the instructions below to familiarize yourself with how to provide a good saliva sample for testing.*

1. Wash your hands with soap and water for at least 20 seconds or clean them with alcohol-based sanitizer.
2. Remove everything from the collection kit, place them in front of you, and set the bag aside.
3. Unscrew the cap from the labelled collection tube.

4. Place the open tube in front of you so that it is standing upright. You may place the cap to the side for now.
5. Remove the pipette tip from its packet starting at the wider end. Avoid touching the narrow end.
6. Swallow once to clear your mouth.
7. Imagine eating your favorite food, think about an upcoming meal or even a sour lemon and allow saliva to pool in your mouth – be patient and this will start to collect!
  - **Remember to avoid coughing or sniffing.**
8. As you feel saliva collecting in your mouth, pick up the collection tube and pipette tip, raise them towards your mouth, and tip your head forward slightly.

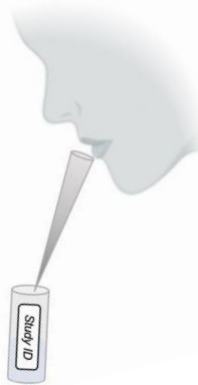

9. Keeping your lips mostly closed, carefully insert the wider end of the pipette tip into your mouth.
10. Very gently pass the saliva from your mouth into the pipette so that it then collects in the tube.
  - **Please do not 'spit' as this can cause droplets or aerosols to spray out at you.**
11. The goal is to collect enough saliva so the tube is half-filled. Please note that any bubbles that may also collect in the tube do not count towards the final volume.
  - **You may have to repeat this process a couple of times until the tube is half-full.**
  - **Be patient, don't force it, and keep thinking about food. You will get there!**
12. Once you have collected enough saliva, tightly screw the cap back onto the collection tube.
  - **Ensure the cap is secure before proceeding to the next step.**
13. Use the alcohol wipe to wipe your hands and the collection tube, but **DO NOT** wipe the printed part of the label.
14. Place the closed collection tube into the biospecimen bag.
15. Discard the alcohol wipe and used pipette tip.
16. Wash your hands thoroughly with soap and water or clean them with alcohol-based sanitizer.
17. Complete the collection usability survey.

# HOW TO COLLECT SALIVA FOR COVID-19 TESTING

## Collection instructions for Saliva Collection Aid

### Before you begin

This test is designed to test saliva that naturally pools in your mouth (for example when you think about a delicious meal).

**It is very important that you do not try to force yourself to produce a saliva sample. Please do not cough anything up from your chest, and please don't sniff anything back from your nose and into your mouth.**

For at least 30 minutes before saliva collection, it is important that you **DO NOT**:

1. Eat or drink
2. Smoke
3. Clean your teeth
4. Chew gum
5. Use nasal sprays

Doing any of these activities could cause you to get an incorrect result.

### Collection kit materials

In addition to these instructions, you should receive:

- One (1) labeled screw-cap tube
- One (1) Saliva Collection Aid
- One (1) single-use alcohol wipe
- One (1) collection usability survey

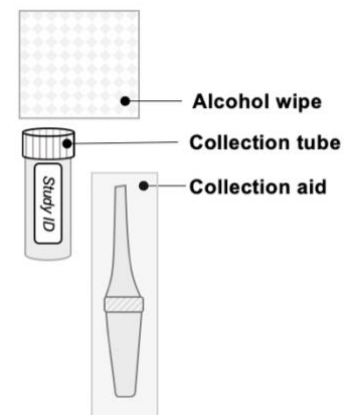

### How to collect saliva

*Before providing your sample, first carefully read through the instructions below to familiarize yourself with how to provide a good saliva sample for testing.*

1. Wash your hands with soap and water for at least 20 seconds or clean them with alcohol-based sanitizer.
2. Remove everything from the collection kit, place them in front of you, and set the bag aside.
3. Unscrew the cap from the labelled collection tube.
4. Place the open tube in front of you so that it is standing upright. You may place the cap to the side for now.
5. Remove the Saliva Collection Aid from its packet and place the ribbed end into the collection tube, as shown in the figure below.

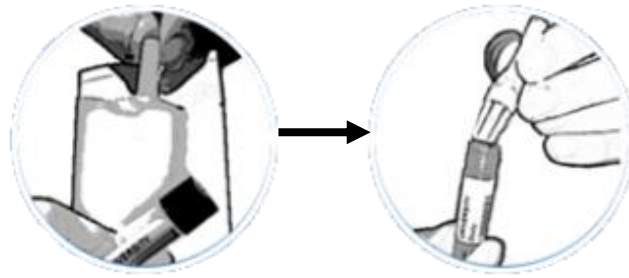

6. Swallow once to clear your mouth.
7. Imagine eating your favorite food, think about an upcoming meal or even a sour lemon and allow saliva to pool in your mouth – be patient and this will start to collect!
  - **Remember to avoid coughing or sniffing.**
8. As you feel saliva collecting in your mouth, pick up the collection tube and Saliva Collection Aid, raise them towards your mouth, and tip your head forward slightly as shown:

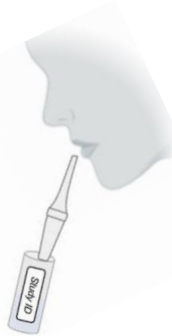

9. Keeping your lips mostly closed, carefully insert the open end of the Saliva Collection Aid into your mouth.
10. Very gently pass the saliva from your mouth into the Saliva Collection Aid so that it then collects in the tube.
  - **Please do not 'spit' as this can cause droplets or aerosols to spray out at you.**
11. The goal is to collect enough saliva so the tube is half-filled. Please note that any bubbles which may also collect in the tube do not count towards the final volume.
  - **You may have to repeat this process a couple of times until the tube is half-full.**
  - **Be patient, don't force it, and keep thinking about food. You will get there!**
12. Once you have collected enough saliva, tightly screw the cap back onto the collection tube.
  - **Ensure the cap is secure before proceeding to the next step.**
13. Use the alcohol wipe to wipe your hands and the collection tube, but **DO NOT** wipe the printed part of the label.
14. Place the closed collection tube into the biospecimen bag.
15. Discard the alcohol wipe and used collection aid.
16. Wash your hands thoroughly with soap and water or clean them with alcohol-based sanitizer.
17. Complete the collection usability survey.

# HOW TO COLLECT SALIVA FOR COVID-19 TESTING

## Collection instructions for Bulb Pipette

### Before you begin

This test is designed to test saliva that naturally pools in your mouth (for example when you think about a delicious meal).

**It is very important that you do not try to force yourself to produce a saliva sample. Please do not cough anything up from your chest, and please don't sniff anything back from your nose and into your mouth.**

For at least 30 minutes before saliva collection, it is important that you **DO NOT**:

1. Eat or drink
2. Smoke
3. Clean your teeth
4. Chew gum
5. Use nasal sprays

Doing any of these activities could cause you to get an incorrect result.

### Collection kit materials

In addition to these instructions, you should receive:

- One (1) labeled screw-cap tube
- One (1) bulb pipette
- One (1) single-use alcohol wipe
- One (1) collection usability survey

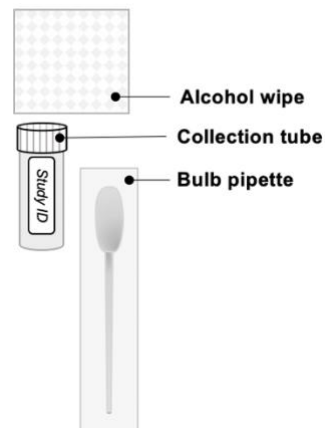

### How to collect saliva

*Before providing your sample, first carefully read through the instructions below to familiarize yourself with how to provide a good saliva sample for testing.*

1. Wash your hands with soap and water for at least 20 seconds or clean them with alcohol-based sanitizer.
2. Remove everything from the collection kit, place them in front of you, and set the bag aside.
3. Unscrew the cap from the labelled collection tube.
4. Place the open tube in front of you so that it is standing upright. You may place the cap to the side for now.
5. Open the bulb pipette packaging starting at the end with the bulb (see illustration).

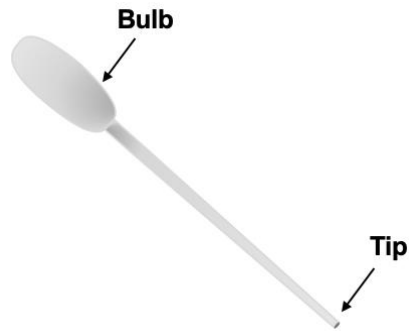

6. Swallow once to clear your mouth.
7. Imagine eating your favorite food, think about an upcoming meal or even a sour lemon and allow saliva to pool in your mouth – be patient and this will start to collect!
  - **Remember to avoid coughing or sniffing.**
8. As you feel saliva collecting in your mouth, pick up the bulb pipette and press the bulb end between your index finger and thumb to push out all of the air.
9. Keeping your lips mostly closed, gently insert the tip of the tip into your mouth where saliva is pooling.
10. Gently release your finger and thumb to allow the bulb pipette to fill with saliva.
11. Remove the bulb pipette from your mouth and pick up the collection tube with your other hand.
12. Carefully insert the tip of the bulb pipette into the collection tube and gently push down on the bulb to slowly expel the saliva into the tube.
13. Repeat steps 8-13 until the collection tube is about half filled. Please note that any bubbles which may also collect in the tube do not count towards the final volume.
  - **You may have to repeat this process a couple of times until the tube is half-full.**
  - **Be patient, don't force it, and keep thinking about food. You will get there!**
14. Once you have collected enough saliva, tightly screw the cap back onto the collection tube.
  - **Ensure the cap is secure before proceeding to the next step.**
15. Use the alcohol wipe to wipe your hands and the collection tube, but **DO NOT** wipe the printed part of the label.
16. Place the closed collection tube into the biospecimen bag.
17. Discard the alcohol wipe and used bulb pipette.
18. Wash your hands thoroughly with soap and water or clean them with alcohol-based sanitizer.
19. Complete the collection usability survey.

# HOW TO COLLECT SALIVA FOR COVID-19 TESTING

## Collection instructions using a Funnel

### Before you begin

This test is designed to test saliva that naturally pools in your mouth (for example when you think about a delicious meal).

**It is very important that you do not try to force yourself to produce a saliva sample. Please do not cough anything up from your chest and please don't sniff anything back from your nose and into your mouth.**

For at least 30 minutes before saliva collection, it is important that you **DO NOT**:

1. Eat or drink
2. Smoke
3. Clean your teeth
4. Chew gum
5. Use nasal sprays

Doing any of these activities could cause you to get an incorrect result.

### Collection kit materials

In addition to these instructions, you should receive:

- One (1) labeled screw-cap tube
- One (1) funnel
- One (1) single-use alcohol wipe
- One (1) collection usability survey

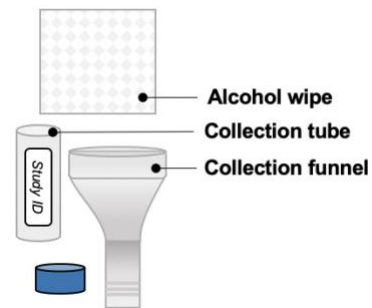

### How to collect saliva

*Before providing your sample, first carefully read through the instructions below to familiarize yourself with how to provide a good saliva sample for testing.*

1. Wash your hands with soap and water for at least 20 seconds or clean them with alcohol-based sanitizer.
2. Remove everything from the collection kit, place them in front of you, and set the bag aside. Avoid touching the inside of the funnel.
3. Swallow once to clear your mouth.
4. Imagine eating your favorite food, think about an upcoming meal or even a sour lemon and allow saliva to pool in your mouth – be patient and this will start to collect!

- **Remember to avoid coughing or sniffing.**

5. As you feel saliva collecting in your mouth, pick up the collection tube and funnel, raise them towards your mouth, and tip your head forward slightly as shown:

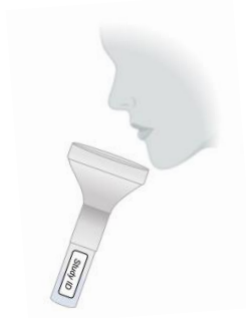

6. Hold the funnel up so that it surrounds your mouth and very gently release the saliva that has pooled in your mouth into the funnel.
  - **Please do not 'spit' as this can cause droplets or aerosols to spray out at you.**
7. The goal is to collect enough saliva so the tube is half-filled. Please note that any bubbles which may also collect in the tube do not count towards the final volume.
  - **You may have to repeat this process a couple of times until the tube is half-full.**
  - **Be patient, don't force it, and keep thinking about food. You will get there!**
8. Once you have collected enough saliva, unscrew the funnel from the collection tube and tightly screw the cap back onto the collection tube.
  - **Ensure the cap is secure before proceeding to the next step.**
9. Use the alcohol wipe to wipe your hands and the collection tube, but **DO NOT** wipe the printed part of the label.
10. Place the closed collection tube into the biospecimen bag.
11. Discard the alcohol wipe and used funnel.
12. Wash your hands thoroughly with soap and water or clean them with alcohol-based sanitizer.
13. Complete the collection usability survey.
